# Supplementary material for: Genetic Interactions Involving Five or More Genes Contribute to a Complex Trait in Yeast
Source: PLOS journal article supplement (doi:10.1371/journal.pgen.1004324), 2014-05-01

**Backcross complex morphology segregant to parent strain to form a heterozygous diploid**

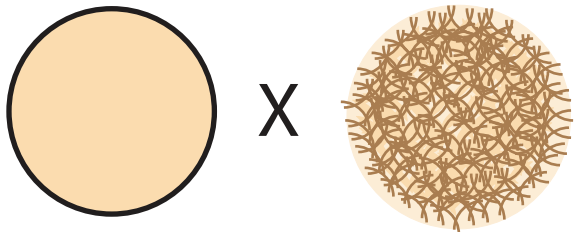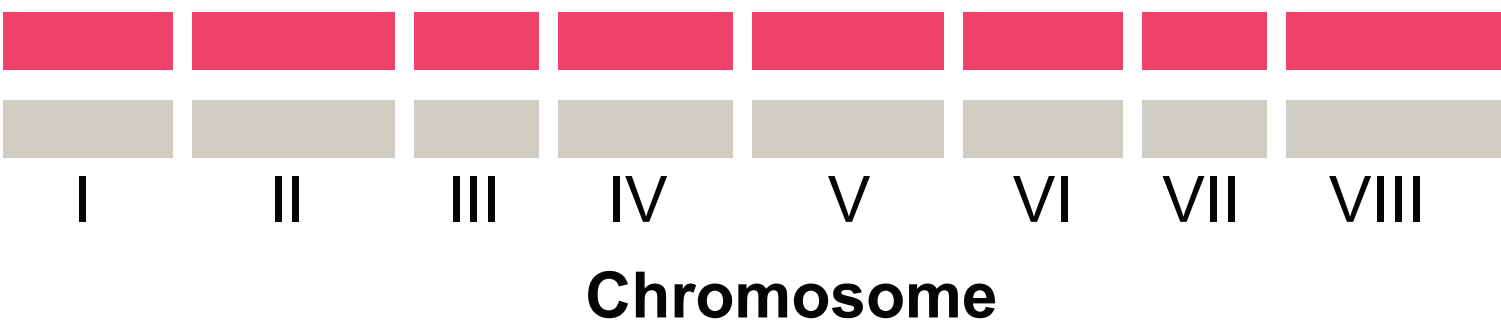

**Sporulate diploid and screen segregants for complex morphology**

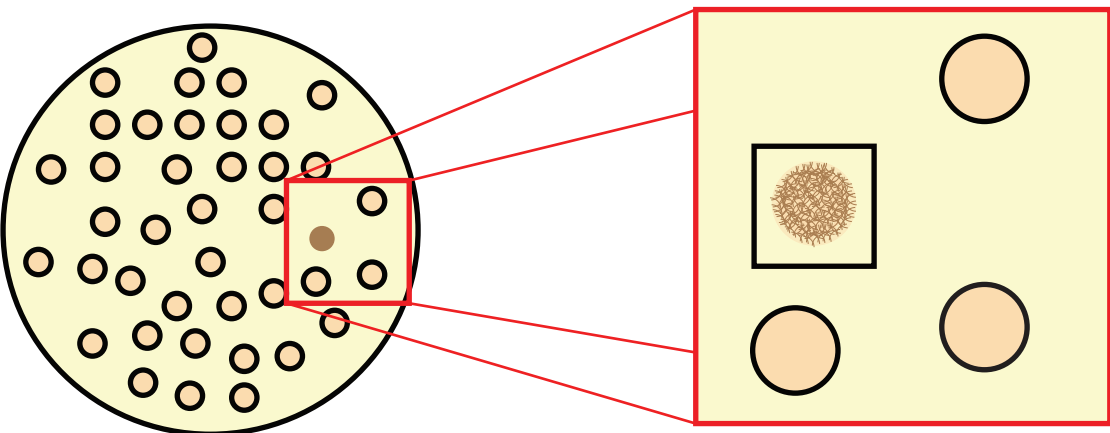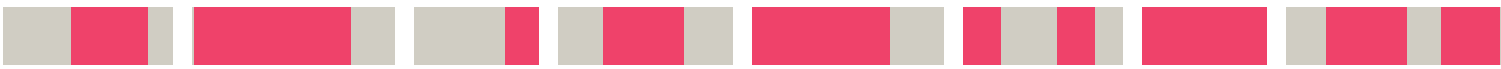

**Backcross complex segregant to one of the parents**

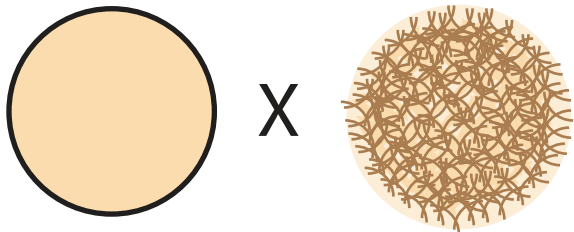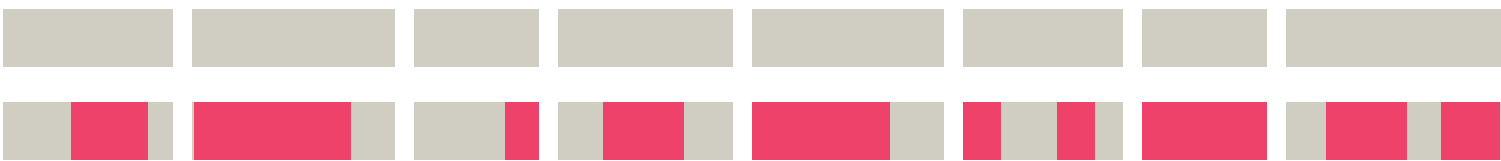

**Sporulate diploid and screen segregants for complex morphology**

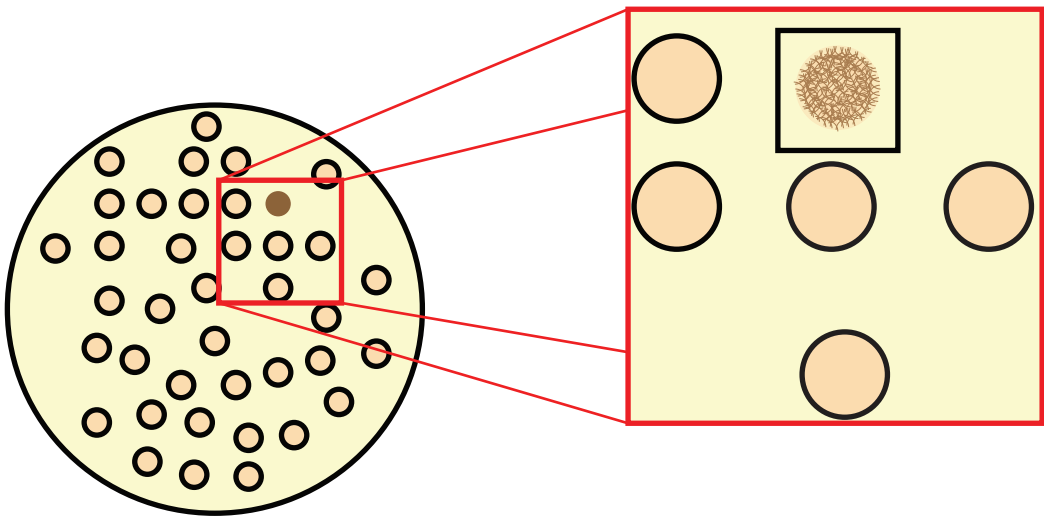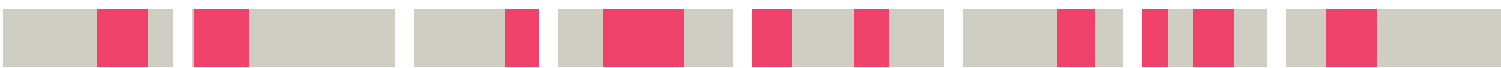

**Backcross complex segregant to one of the parents**

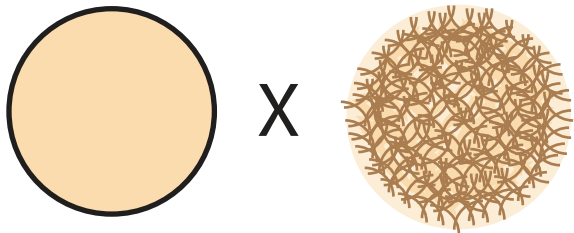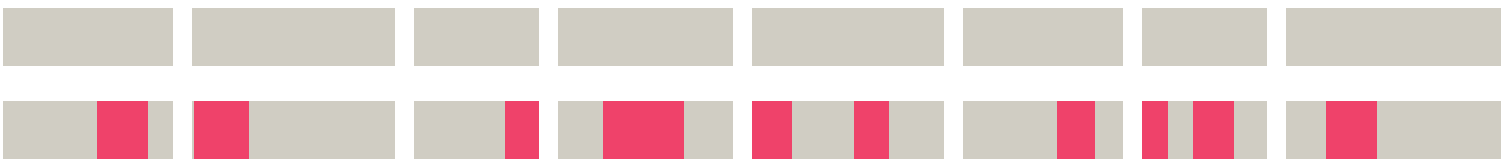

**Repeat sporulation, phenotypic screening, and backcrossing multiple times**

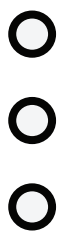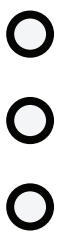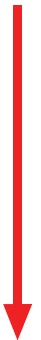

**Sporulate diploid and screen segregants for complex morphology**

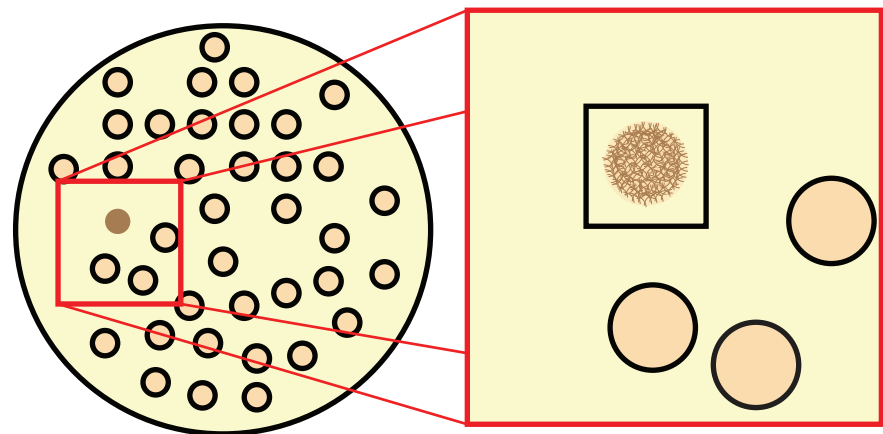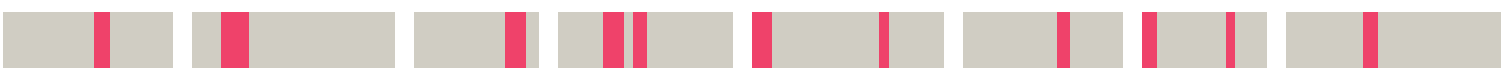

Supplement: S3 (10.1371/journal.pgen.1004324.s003) [file journal.pgen.1004324.s003]
